# Supplementary material for: DNA extraction protocols cause differences in 16S rRNA amplicon sequencing efficiency but not in community profile composition or structure
Source: PubMed Central journal article supplement (PMC4263514; doi:10.1002/mbo3.216), 2014-09-26

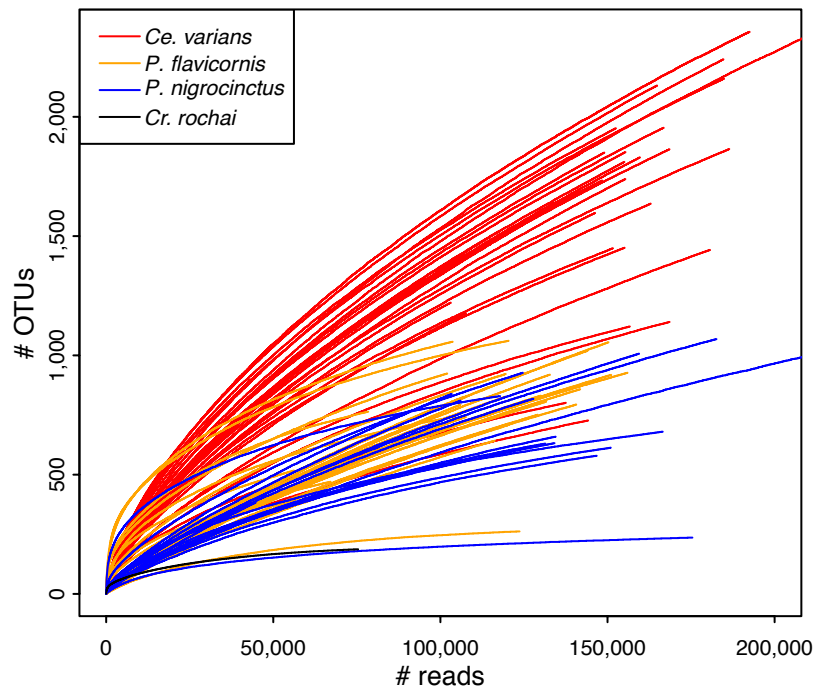

Supplement: mbo30003-0910-sd1.pdf [file mbo30003-0910-sd1.pdf]
